# Supplementary material
Source: Research Square preprint supplement (doi:10.21203/rs.3.rs-9204935/v1)

Full-length blots corresponding to the proteins shown in Figure 3A.

**A**

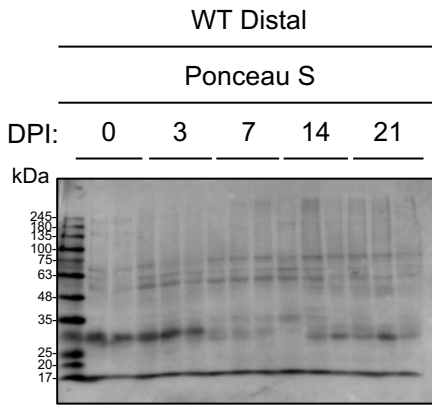

**B**

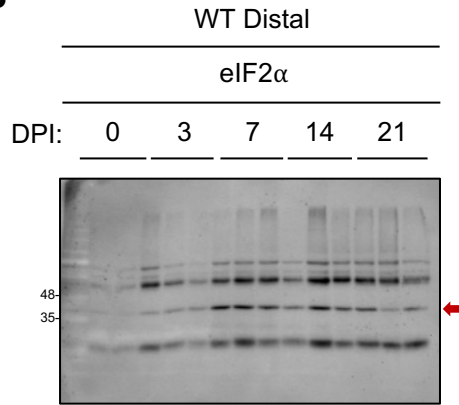

**C**

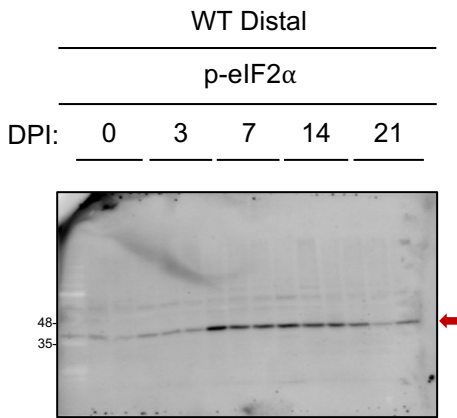

**D**

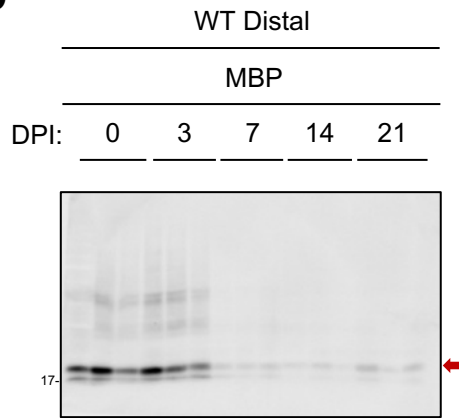

**E**

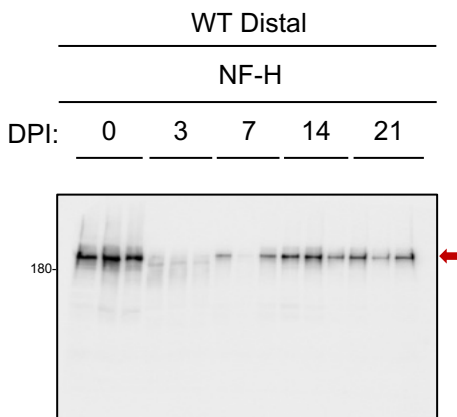

Full-length blots corresponding to the proteins shown in Figure 3D.

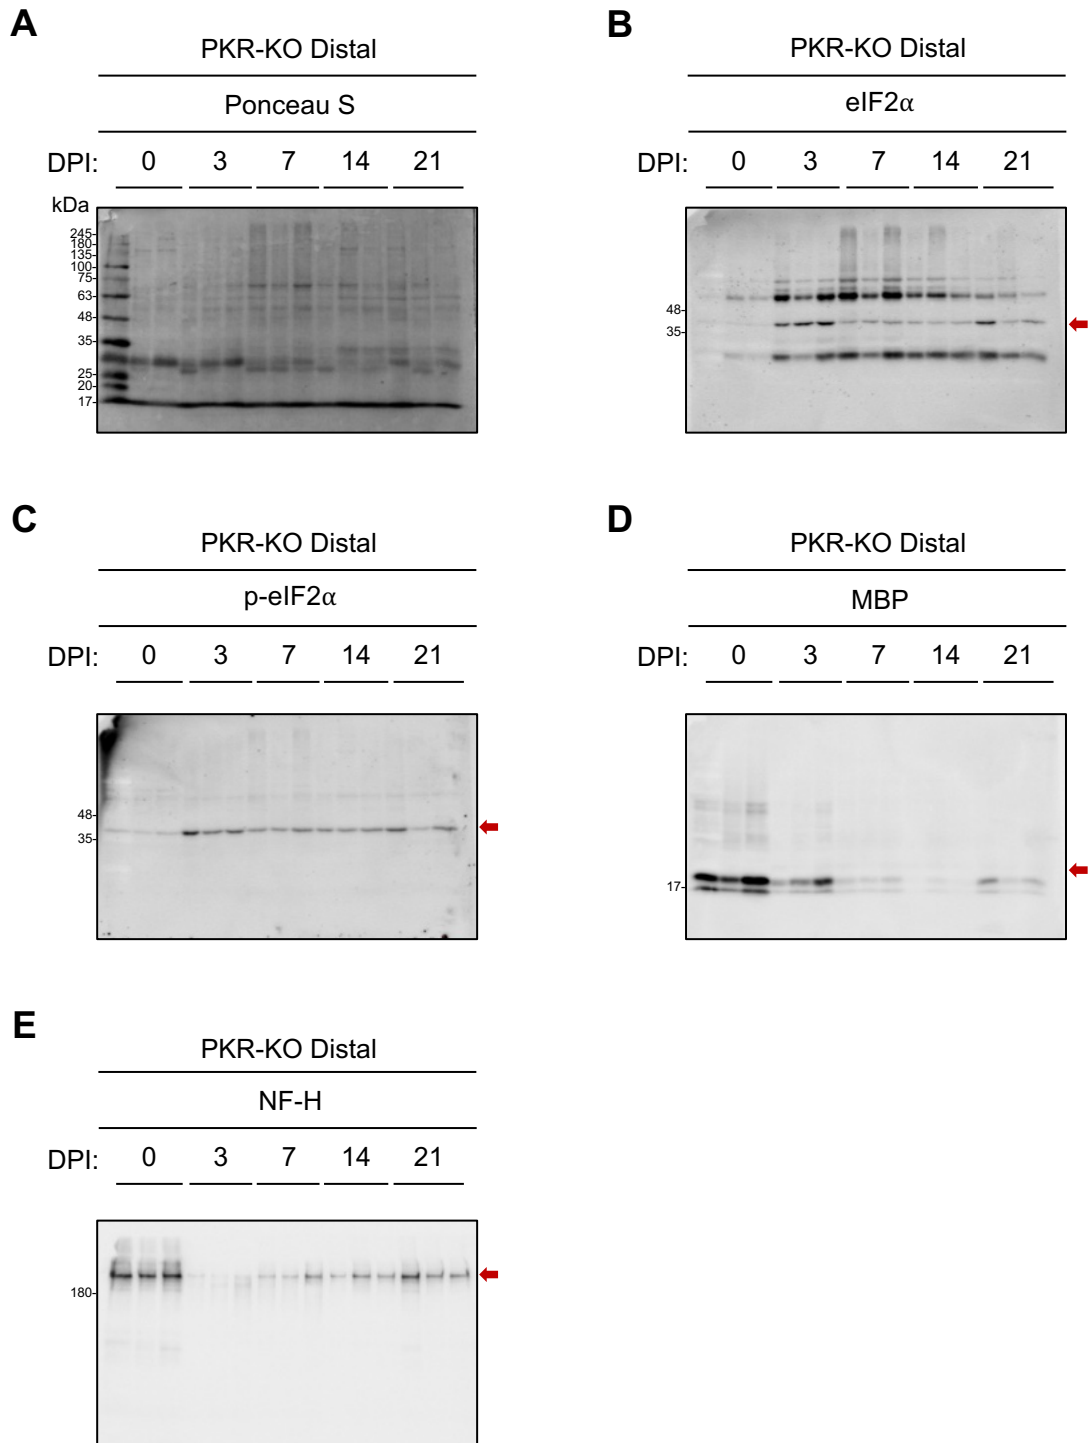

Full-length blots corresponding to the proteins shown in Figure Supplementary 3A.

**A**

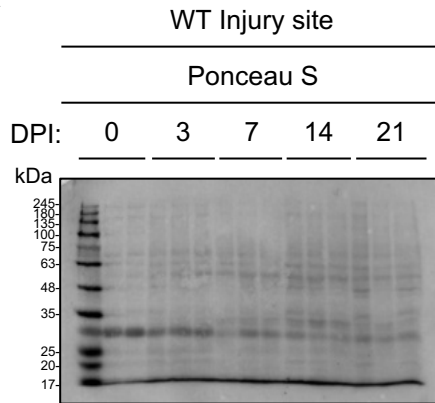

**B**

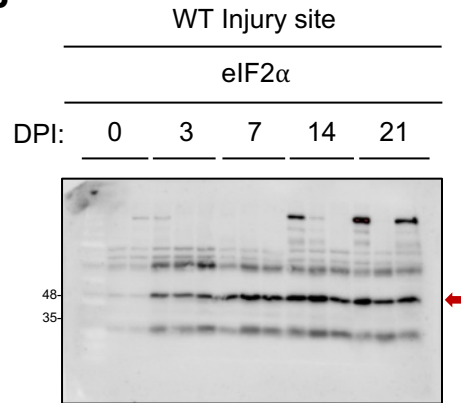

**C**

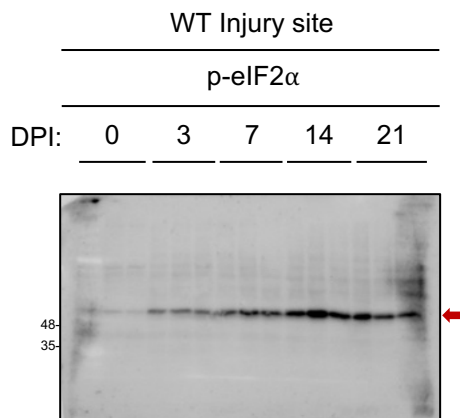

Full-length blots corresponding to the proteins shown in Figure Supplementary 3C.

**A**

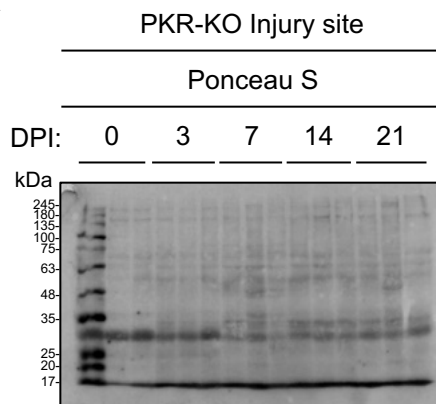

**B**

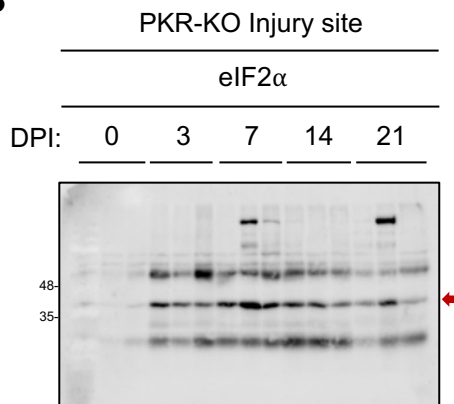

**C**

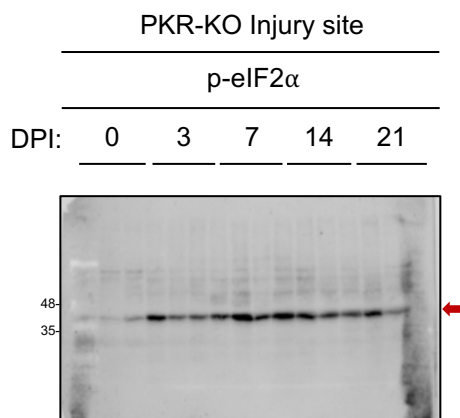

Full-length blots corresponding to the proteins shown in Figure 4A.

**A**

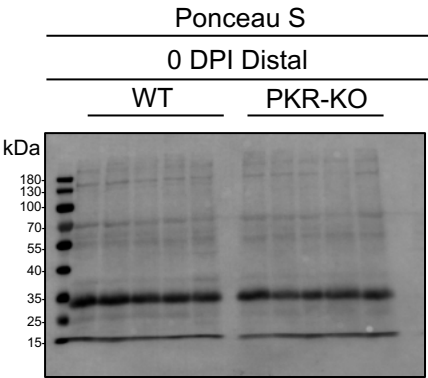

**B**

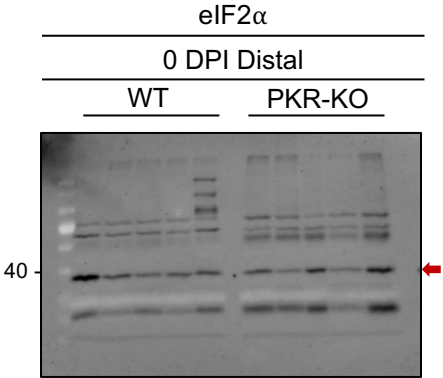

**C**

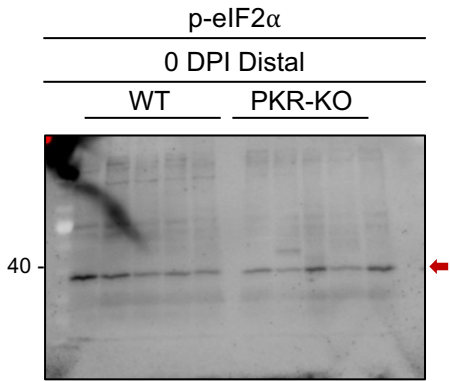

**D**

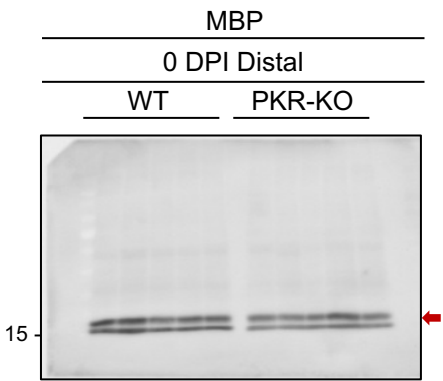

**E**

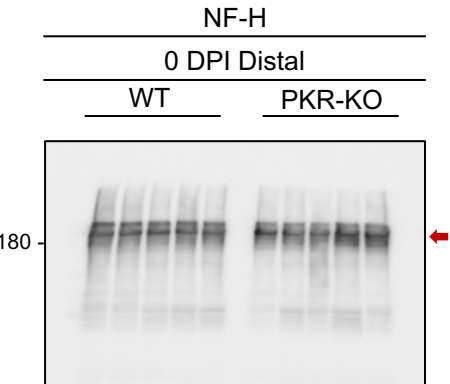

Full-length blots corresponding to the proteins shown in Figure 4B.

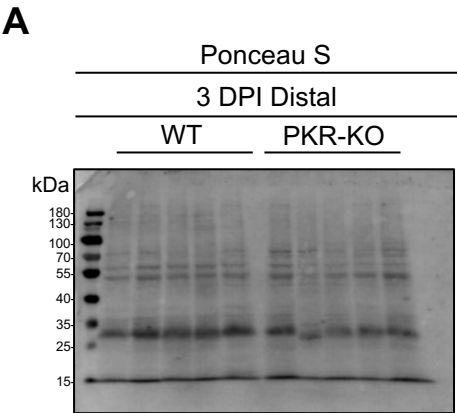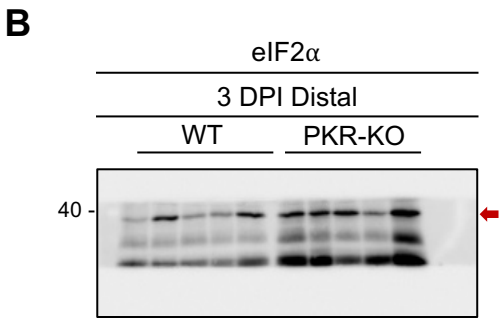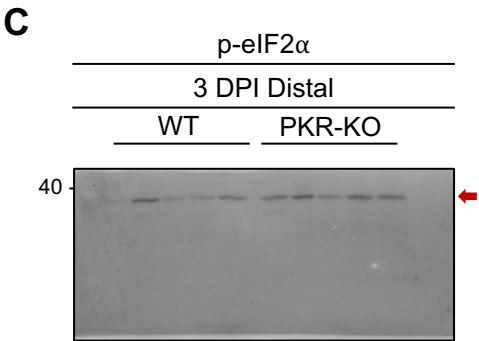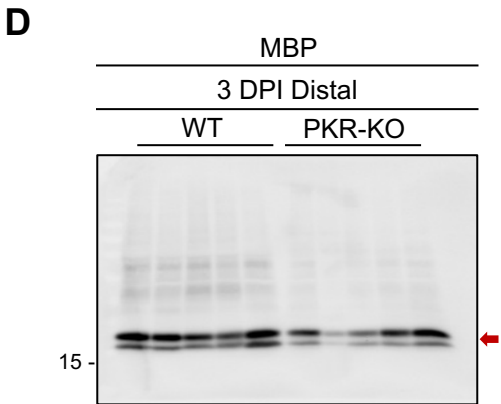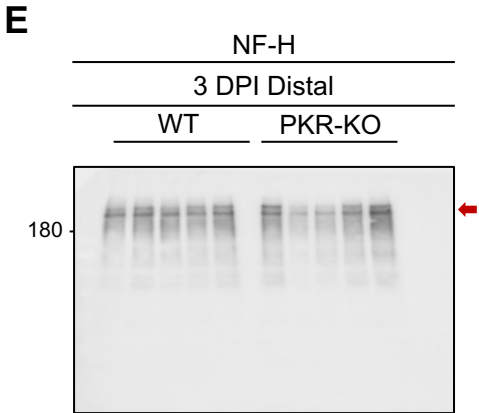

Full-length blots corresponding to the proteins shown in Figure Supplementary 4B.

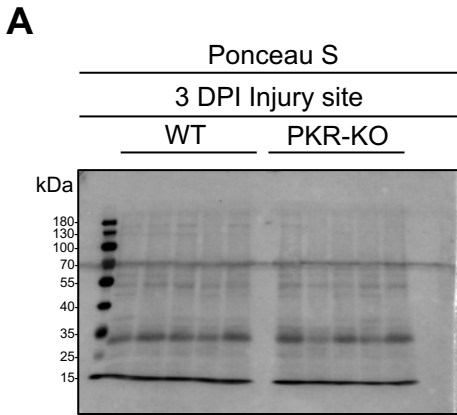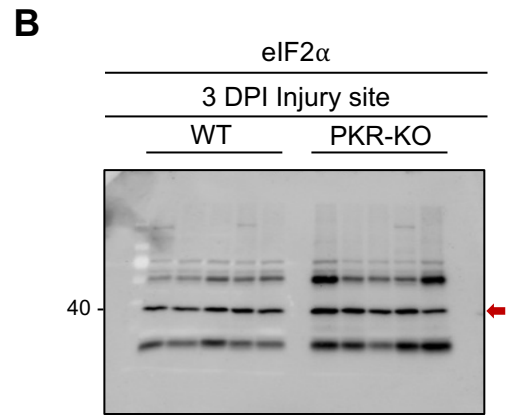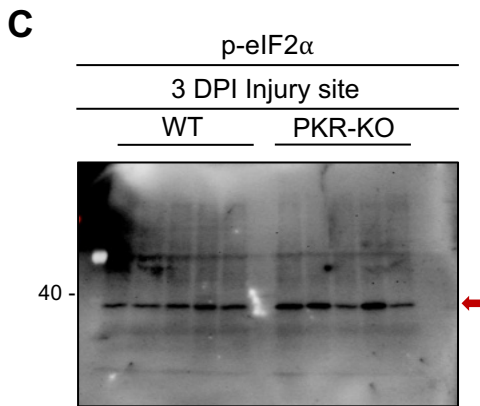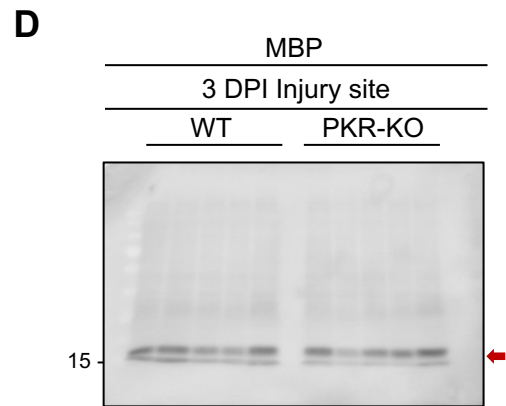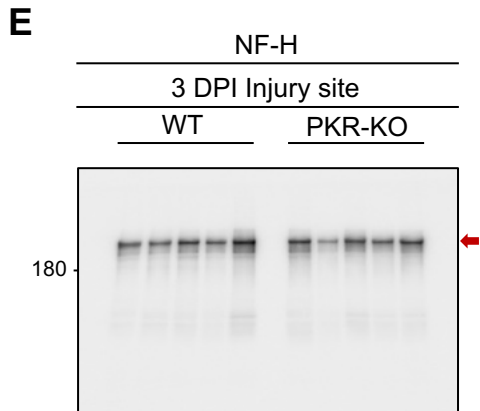

Full-length blots corresponding to the proteins shown in Figure 5A.

**A**

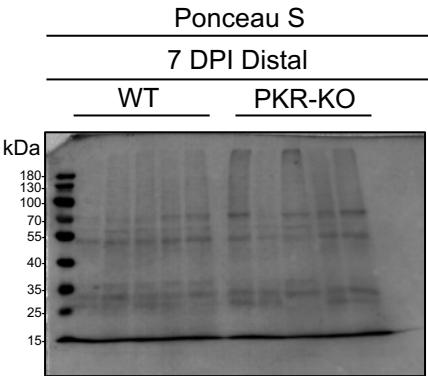

**B**

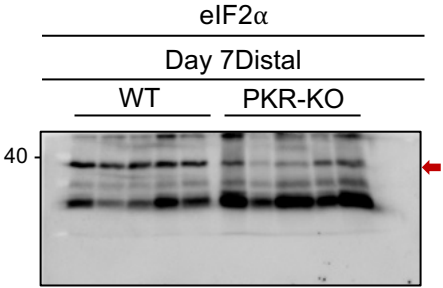

**C**

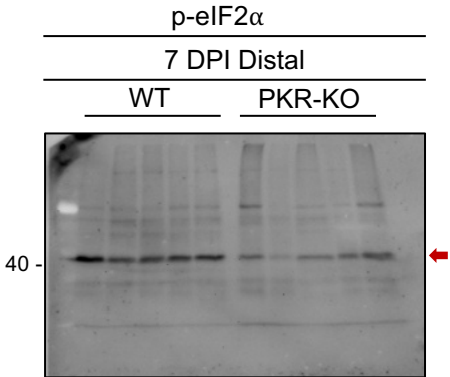

**D**

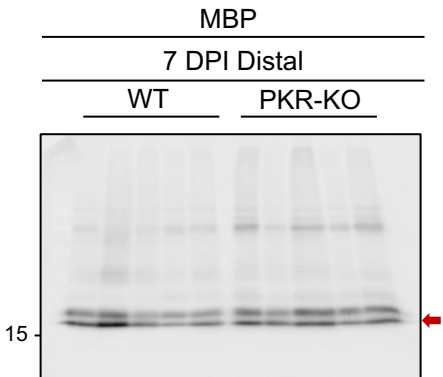

**E**

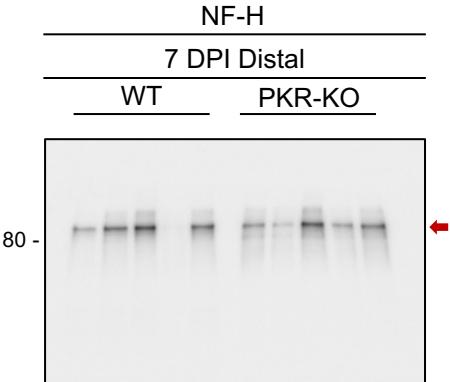

Full-length blots corresponding to the proteins shown in Figure 5B.

**A**

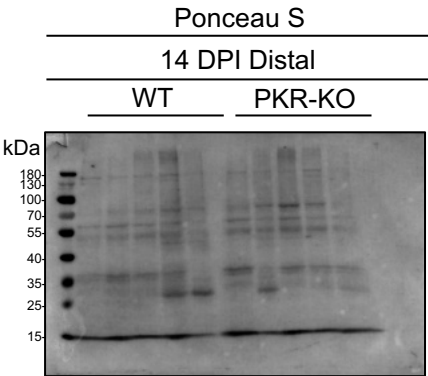

**B**

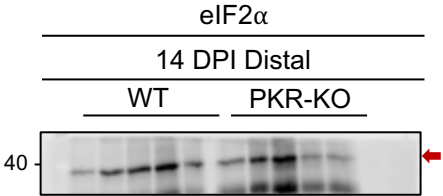

**C**

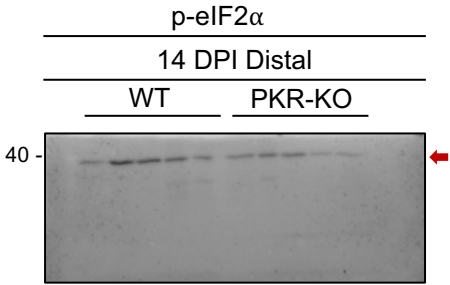

**D**

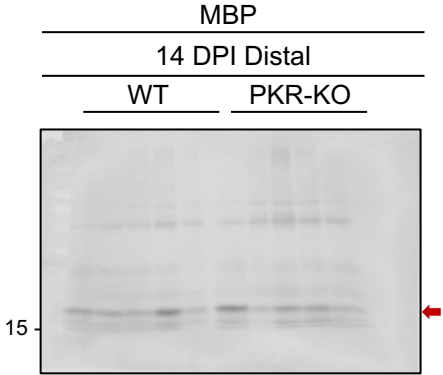

**E**

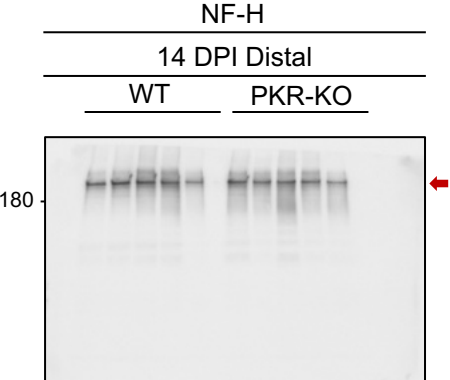

Full-length blots corresponding to the proteins shown in Figure 5C.

**A**

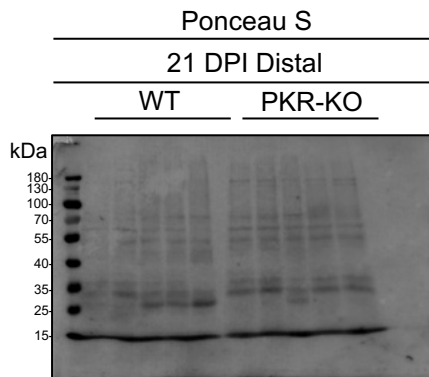

**B**

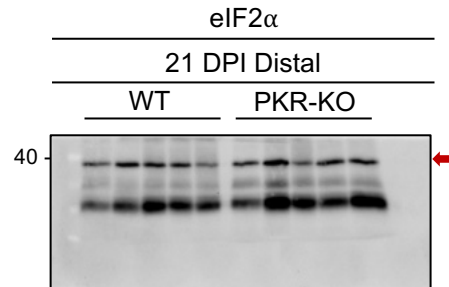

**C**

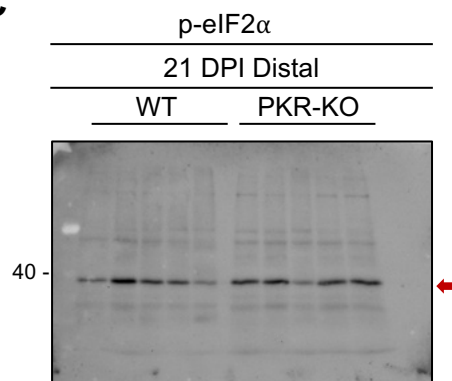

**D**

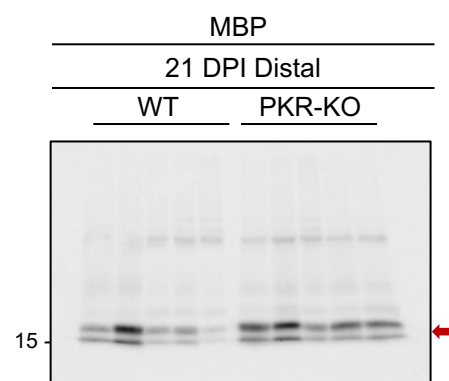

**E**

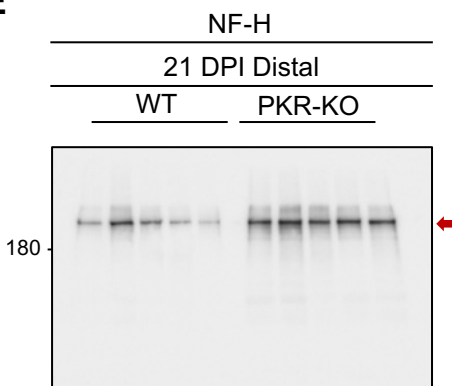

Full-length blots corresponding to the proteins shown in Figure Supplementary 5A.

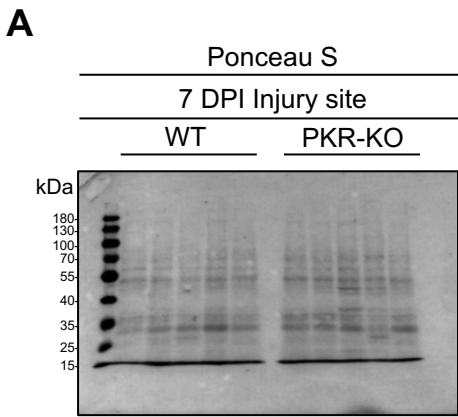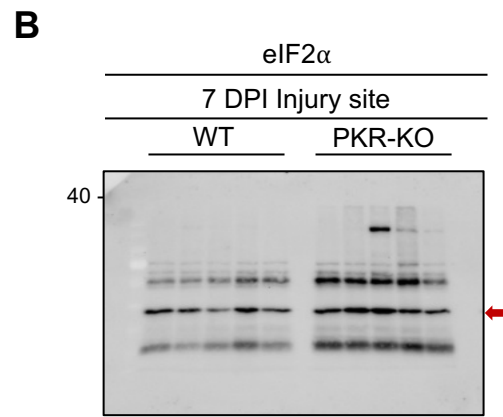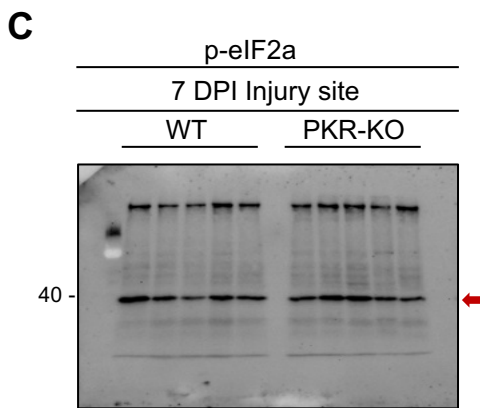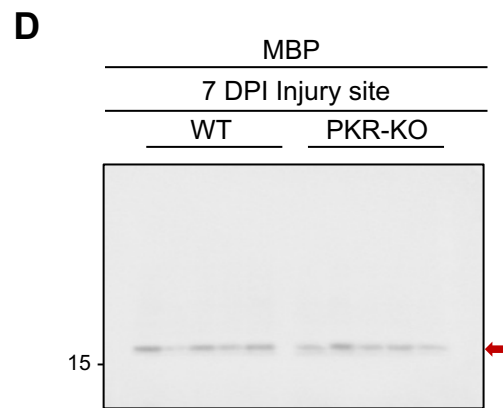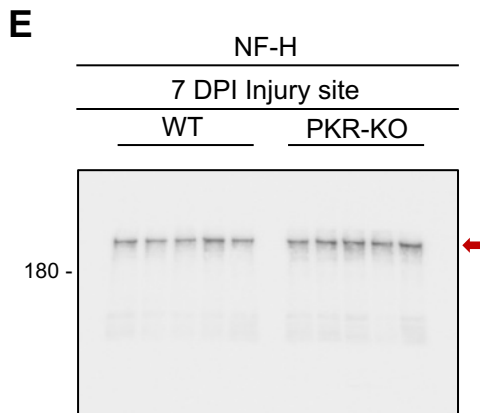

Full-length blots corresponding to the proteins shown in Figure Supplementary 5B.

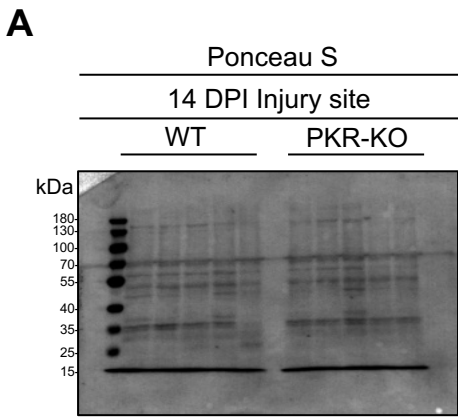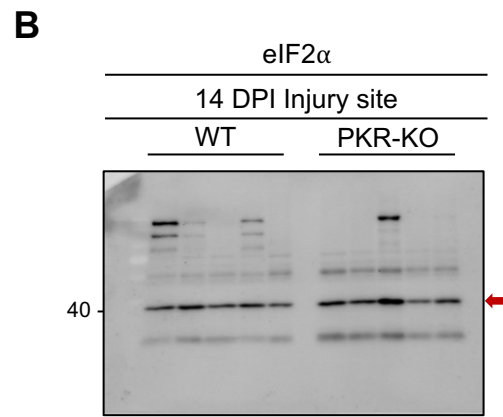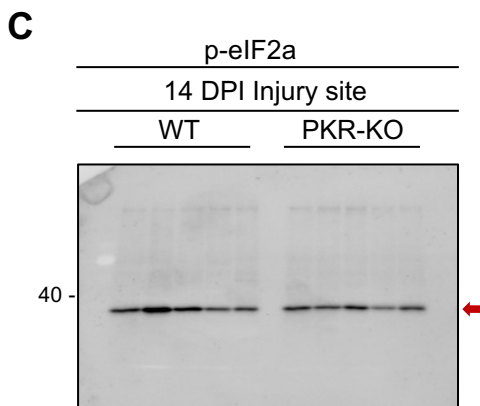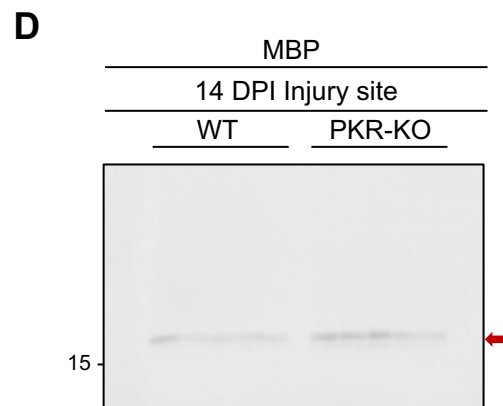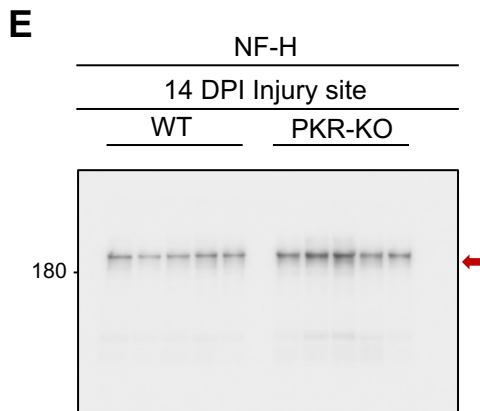

Full-length blots corresponding to the proteins shown in Figure Supplementary 5C.

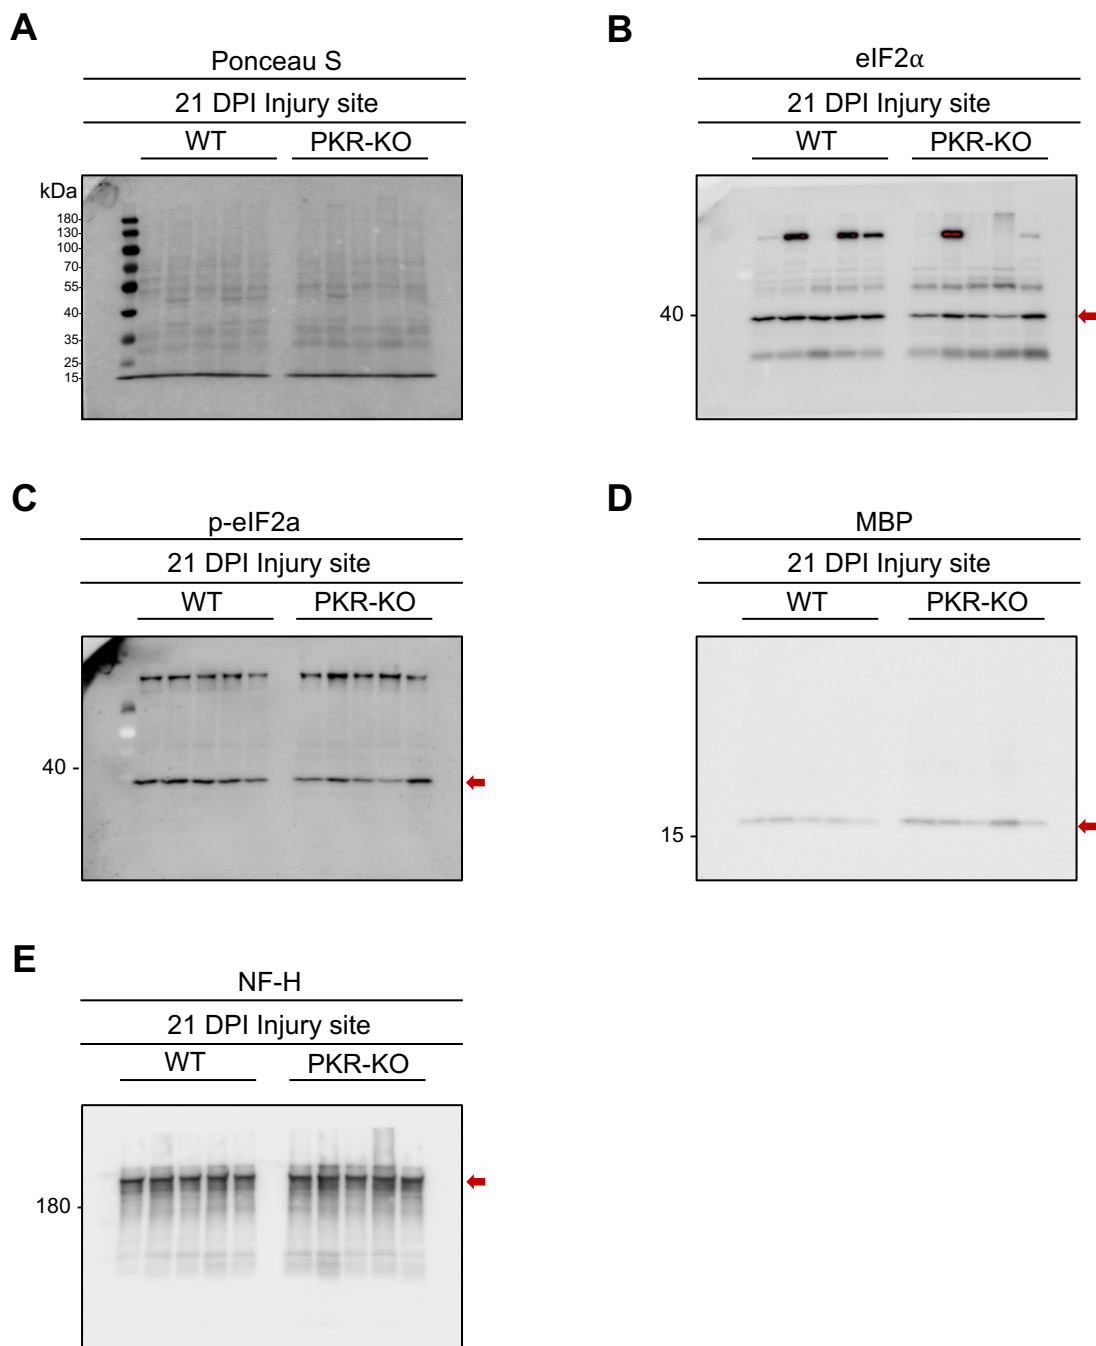

Supplement: Supplementary file 1 [file 00ce46b09afb4d85f783121b.pdf]
